# Supplementary material
Source: publisher figshare collection journal article supplement (https://tandf.figshare.com/ndownloader/files/17616692)
Supplement: Supplementary file 1 [file 17616692]

**Supplementary Table**

Table S1.

Results of F1 and F2 genetic crosses (5 replicates) between homozygous light and dark strains of *D. punjabiensis* for female progeny scored. Only females demonstrate body color polymorphism.

| Genetic  Crosses | Type/  Replicate | ♀ Flies scored*(*n*) | Light ♀ morph  (Frequency %) | Dark ♀ morph (Frequency %) | Mendelian  ratio | χ 2  test |
| --- | --- | --- | --- | --- | --- | --- |
| A Light ♀ * Dark ♂  F1A♀* F1A♂  B Dark ♀ * Light ♂  F1A♀* F1A♂ | F1  F2: 1  2  3  4  5  F1  F2: 1  2  3  4  5 | 100  105  125  113  106  95  100  106  113  116  95  115 | 100  79  95  85  79  71  100  80  85  87  72  86 | 0  26  30  28  27  24  0  26  28  29  23  29 | ------  3.04:1  3.16:1  3.03:1  2.92:1  2.96:1  -----  3.07:1  3.03:1  3.00:1  3.13:1  2.96:1 | -----  NS  NS  NS  NS  NS  NS  NS  NS  NS  NS |
